# Supplementary material for: Gene expression profiling of perineural invasion in head and neck cutaneous squamous cell carcinoma
Source: PubMed Central journal article supplement (PMC8222302; doi:10.1038/s41598-021-92335-4), 2021-06-23
Supplement: 41598_2021_92335_MOESM2_ESM.pdf [file 41598_2021_92335_MOESM2_ESM.pdf]

## **Supplementary Tables and Figures**

### **Manuscript Title:**

**GENE EXPRESSION PROFILING OF PERINEURAL INVASION IN HEAD AND NECK CUTANEOUS SQUAMOUS CELL CARCINOMA.**

### **Authors:**

**Timothy J Eviston, Elahe Minaei, Simon A Mueller, Navid Ahmadi, Bruce Ashford, Jonathan R Clark, Nicholas West, Ping Zhang, Ruta Gupta, Marie Ranson**

**Supplementary Table 1.** List of 144 significantly DEG between extensive (EXT) PNI versus combined focal and non PNI (FOC\_NON) based on adjusted P-values <0.01, ranked by increasing P-values. Grey highlighted genes are downregulated in EXT PNI with fold change < -2. Bolded genes are DEG with fold change >3 or < -3 (n = 70). LogFC = log2 fold change. CI.L/R = confidence intervals left/right.

|    | HUGO            | Average_EXT | Average_FOC_NON | logFC    | CI.L     | CI.R     | AveExpr  | t        | P.Value  | adj.P.Val | B        |
|----|-----------------|-------------|-----------------|----------|----------|----------|----------|----------|----------|-----------|----------|
| 1  | <b>PTGIS</b>    | 8.176542    | 3.911408        | 4.265134 | 3.057936 | 5.472331 | 6.280926 | 7.109034 | 5.81E-09 | 4.3E-06   | 10.41069 |
| 2  | <b>THBS4</b>    | 9.00886     | 4.012144        | 4.996716 | 3.534998 | 6.458434 | 6.788097 | 6.878239 | 1.3E-08  | 4.79E-06  | 9.646227 |
| 3  | <b>SRGN</b>     | 12.18703    | 10.15644        | 2.030587 | 1.403969 | 2.657205 | 11.28455 | 6.520409 | 4.51E-08 | 1.11E-05  | 8.458462 |
| 4  | <b>FERMT2</b>   | 8.993999    | 7.276204        | 1.717795 | 1.150489 | 2.285101 | 8.230535 | 6.092708 | 2E-07    | 2.99E-05  | 7.039322 |
| 5  | <b>NR4A3</b>    | 8.541688    | 5.711376        | 2.830313 | 1.895107 | 3.765518 | 7.283772 | 6.089529 | 2.02E-07 | 2.99E-05  | 7.028792 |
| 6  | <b>TIMP1</b>    | 11.85543    | 9.6565          | 2.198932 | 1.45043  | 2.947434 | 10.87813 | 5.911193 | 3.76E-07 | 4.63E-05  | 6.438852 |
| 7  | <b>SAMSN1</b>   | 8.602073    | 7.071685        | 1.530389 | 1.002459 | 2.058318 | 7.921901 | 5.832864 | 4.93E-07 | 5.21E-05  | 6.180302 |
| 8  | <b>HGF</b>      | 6.548982    | 3.692766        | 2.856216 | 1.836671 | 3.875761 | 5.279552 | 5.636905 | 9.7E-07  | 8.97E-05  | 5.535427 |
| 9  | <b>VCAN</b>     | 10.04003    | 8.191016        | 1.849012 | 1.172124 | 2.5259   | 9.218245 | 5.496411 | 1.57E-06 | 0.000122  | 5.075177 |
| 10 | <b>C3</b>       | 10.04841    | 6.81079         | 3.237621 | 2.049321 | 4.425922 | 8.609468 | 5.482214 | 1.65E-06 | 0.000122  | 5.028781 |
| 11 | <b>IGFBP7</b>   | 13.07847    | 11.3441         | 1.734371 | 1.094327 | 2.374415 | 12.30764 | 5.45241  | 1.83E-06 | 0.000123  | 4.931453 |
| 12 | <b>AKAP12</b>   | 8.538593    | 5.737349        | 2.801244 | 1.733657 | 3.868831 | 7.293595 | 5.279635 | 3.31E-06 | 0.000204  | 4.36935  |
| 13 | <b>MS4A4A</b>   | 9.520656    | 8.025336        | 1.49532  | 0.921147 | 2.069492 | 8.85607  | 5.240199 | 3.78E-06 | 0.000207  | 4.241595 |
| 14 | <b>LHFP</b>     | 8.942235    | 7.475332        | 1.466903 | 0.902555 | 2.031252 | 8.290278 | 5.230104 | 3.91E-06 | 0.000207  | 4.208929 |
| 15 | <b>CDH2</b>     | 5.481306    | 2.811874        | 2.669432 | 1.63051  | 3.708353 | 4.294892 | 5.170022 | 4.8E-06  | 0.000224  | 4.014806 |
| 16 | <b>SLIT2</b>    | 6.829539    | 4.184884        | 2.644655 | 1.614805 | 3.674506 | 5.654137 | 5.167152 | 4.85E-06 | 0.000224  | 4.005547 |
| 17 | <b>FAP</b>      | 9.81836     | 7.676393        | 2.141967 | 1.300917 | 2.983016 | 8.866375 | 5.124452 | 5.61E-06 | 0.000244  | 3.867939 |
| 18 | <b>ITGA5</b>    | 10.2619     | 9.106893        | 1.155003 | 0.698652 | 1.611353 | 9.748561 | 5.092611 | 6.24E-06 | 0.00025   | 3.765509 |
| 19 | <b>CDH11</b>    | 10.7942     | 9.018946        | 1.775257 | 1.072582 | 2.477933 | 10.0052  | 5.083499 | 6.44E-06 | 0.00025   | 3.736229 |
| 20 | <b>HLA.DPB1</b> | 12.20502    | 10.81758        | 1.387442 | 0.836685 | 1.938198 | 11.58838 | 5.068873 | 6.77E-06 | 0.00025   | 3.689256 |
| 21 | <b>FGFR3</b>    | 8.094096    | 10.70626        | -2.61217 | -3.65298 | -1.57135 | 9.255059 | -5.04989 | 7.21E-06 | 0.000254  | 3.628351 |
| 22 | <b>SERPING1</b> | 11.61714    | 10.11045        | 1.506696 | 0.902587 | 2.110805 | 10.9475  | 5.018415 | 8.02E-06 | 0.00027   | 3.527479 |
| 23 | <b>APOD</b>     | 10.46412    | 6.511564        | 3.952558 | 2.353878 | 5.551238 | 8.70743  | 4.97477  | 9.3E-06  | 0.00029   | 3.387904 |
| 24 | <b>FGF18</b>    | 4.890604    | 2.313239        | 2.577365 | 1.534264 | 3.620466 | 3.745109 | 4.971712 | 9.39E-06 | 0.00029   | 3.378137 |
| 25 | <b>PLXND1</b>   | 9.777288    | 8.725009        | 1.052279 | 0.624724 | 1.479834 | 9.309608 | 4.952166 | 1E-05    | 0.000297  | 3.315751 |

|    |                 |          |          |          |          |          |          |          |          |          |          |
|----|-----------------|----------|----------|----------|----------|----------|----------|----------|----------|----------|----------|
| 26 | <b>MPDZ</b>     | 8.066133 | 6.332897 | 1.733236 | 1.023495 | 2.442977 | 7.295806 | 4.91376  | 1.14E-05 | 0.000325 | 3.193372 |
| 27 | <b>JAM3</b>     | 8.947986 | 7.407351 | 1.540635 | 0.90642  | 2.17485  | 8.26326  | 4.887868 | 1.25E-05 | 0.000333 | 3.111027 |
| 28 | <b>ZFPM2</b>    | 4.633681 | 2.242943 | 2.390738 | 1.405794 | 3.375683 | 3.571131 | 4.88401  | 1.26E-05 | 0.000333 | 3.098769 |
| 29 | <b>SULF1</b>    | 10.64963 | 8.627711 | 2.021922 | 1.18476  | 2.859083 | 9.751001 | 4.859721 | 1.37E-05 | 0.000349 | 3.021657 |
| 30 | <b>DDR2</b>     | 8.769871 | 6.950236 | 1.819636 | 1.06441  | 2.574862 | 7.961144 | 4.848013 | 1.42E-05 | 0.000351 | 2.984529 |
| 31 | <b>SFRP2</b>    | 11.90511 | 9.631576 | 2.273538 | 1.326233 | 3.220843 | 10.89465 | 4.829126 | 1.52E-05 | 0.000362 | 2.924691 |
| 32 | <b>SERPINF1</b> | 11.65157 | 10.09272 | 1.55885  | 0.900421 | 2.217279 | 10.95875 | 4.76378  | 1.89E-05 | 0.000436 | 2.718227 |
| 33 | <b>TBXA2R</b>   | 4.736541 | 2.327017 | 2.409525 | 1.387441 | 3.431608 | 3.665642 | 4.743525 | 2.02E-05 | 0.000452 | 2.654413 |
| 34 | <b>MGP</b>      | 10.93773 | 8.228106 | 2.709628 | 1.551047 | 3.86821  | 9.733455 | 4.705865 | 2.29E-05 | 0.000497 | 2.536001 |
| 35 | <b>CYP1B1</b>   | 7.29957  | 4.774274 | 2.525296 | 1.434826 | 3.615765 | 6.177216 | 4.659667 | 2.66E-05 | 0.000563 | 2.391176 |
| 36 | <b>LY96</b>     | 8.985937 | 7.821156 | 1.164781 | 0.657489 | 1.672073 | 8.468257 | 4.620008 | 3.04E-05 | 0.000624 | 2.267237 |
| 37 | <b>FGFR1</b>    | 9.116971 | 7.730922 | 1.38605  | 0.778541 | 1.993558 | 8.500949 | 4.59074  | 3.34E-05 | 0.000669 | 2.17601  |
| 38 | <b>FGL2</b>     | 8.677779 | 7.238421 | 1.439358 | 0.804511 | 2.074206 | 8.038064 | 4.562007 | 3.68E-05 | 0.000713 | 2.086652 |
| 39 | <b>FN1</b>      | 13.04137 | 11.01434 | 2.027021 | 1.130222 | 2.923819 | 12.14047 | 4.54799  | 3.85E-05 | 0.000713 | 2.043132 |
| 40 | <b>ICAM1</b>    | 9.93147  | 8.502919 | 1.42855  | 0.796501 | 2.0606   | 9.296559 | 4.547792 | 3.85E-05 | 0.000713 | 2.042515 |
| 41 | <b>NR4A1</b>    | 9.925446 | 7.351176 | 2.57427  | 1.428029 | 3.720512 | 8.781326 | 4.518917 | 4.24E-05 | 0.000764 | 1.953023 |
| 42 | <b>NDNF</b>     | 5.978693 | 3.15764  | 2.821053 | 1.557249 | 4.084856 | 4.724891 | 4.491464 | 4.63E-05 | 0.000817 | 1.868131 |
| 43 | <b>PLXNC1</b>   | 9.103322 | 7.994631 | 1.108691 | 0.610895 | 1.606487 | 8.610571 | 4.48142  | 4.79E-05 | 0.000824 | 1.837122 |
| 44 | <b>SPARCL1</b>  | 10.72327 | 8.756495 | 1.966778 | 1.080653 | 2.852904 | 9.84915  | 4.465976 | 5.04E-05 | 0.000847 | 1.78949  |
| 45 | <b>BNC2</b>     | 5.981212 | 3.900942 | 2.080271 | 1.136124 | 3.024417 | 5.056647 | 4.433399 | 5.6E-05  | 0.000921 | 1.689225 |
| 46 | <b>FOXC2</b>    | 6.089285 | 3.786533 | 2.302752 | 1.25531  | 3.350195 | 5.065839 | 4.423574 | 5.78E-05 | 0.000931 | 1.65904  |
| 47 | <b>PTX3</b>     | 5.655791 | 2.897084 | 2.758707 | 1.500468 | 4.016947 | 4.429699 | 4.411625 | 6.01E-05 | 0.000947 | 1.622365 |
| 48 | <b>ITGB2</b>    | 9.390146 | 8.12456  | 1.265586 | 0.682801 | 1.84837  | 8.827663 | 4.369582 | 6.89E-05 | 0.001043 | 1.493638 |
| 49 | <b>FBLN1</b>    | 11.6077  | 9.763386 | 1.844315 | 0.994191 | 2.694439 | 10.788   | 4.365249 | 6.99E-05 | 0.001043 | 1.480399 |
| 50 | <b>OLFML2B</b>  | 9.640894 | 8.409339 | 1.231555 | 0.663367 | 1.799743 | 9.093536 | 4.361322 | 7.08E-05 | 0.001043 | 1.468406 |
| 51 | <b>PECAM1</b>   | 9.79908  | 8.52566  | 1.27342  | 0.685301 | 1.861539 | 9.233115 | 4.35675  | 7.19E-05 | 0.001043 | 1.454447 |
| 52 | <b>AKAP2</b>    | 9.879174 | 8.64341  | 1.235764 | 0.663769 | 1.807758 | 9.329946 | 4.347104 | 7.42E-05 | 0.001055 | 1.425015 |
| 53 | <b>VEZF1</b>    | 8.660196 | 7.79851  | 0.861687 | 0.460969 | 1.262404 | 8.277224 | 4.326805 | 7.92E-05 | 0.001106 | 1.363167 |
| 54 | <b>PXDN</b>     | 9.676528 | 8.470313 | 1.206214 | 0.644464 | 1.767964 | 9.140432 | 4.320536 | 8.08E-05 | 0.001107 | 1.344091 |

|    |                 |          |          |          |          |          |          |          |          |          |          |
|----|-----------------|----------|----------|----------|----------|----------|----------|----------|----------|----------|----------|
| 55 | <b>OGN</b>      | 8.456998 | 5.104503 | 3.352495 | 1.777635 | 4.927354 | 6.967    | 4.28334  | 9.11E-05 | 0.001226 | 1.231138 |
| 56 | <i>WIPF1</i>    | 9.732064 | 8.7522   | 0.979864 | 0.51705  | 1.442678 | 9.296569 | 4.260058 | 9.82E-05 | 0.001276 | 1.160641 |
| 57 | <b>SLC2A1</b>   | 8.811934 | 10.97299 | -2.16105 | -3.18183 | -1.14028 | 9.772403 | -4.25981 | 9.83E-05 | 0.001276 | 1.15989  |
| 58 | <i>ZCCHC24</i>  | 8.871509 | 7.596307 | 1.275202 | 0.669988 | 1.880416 | 8.304752 | 4.239615 | 0.000105 | 0.001337 | 1.098876 |
| 59 | <b>CDS1</b>     | 7.299836 | 8.845294 | -1.54546 | -2.27983 | -0.81108 | 7.986706 | -4.23443 | 0.000107 | 0.001337 | 1.08324  |
| 60 | <b>CAMK2A</b>   | 4.153675 | 1.952525 | 2.20115  | 1.152569 | 3.24973  | 3.175386 | 4.223807 | 0.00011  | 0.001361 | 1.051203 |
| 61 | <i>ENPP2</i>    | 8.705625 | 7.225327 | 1.480298 | 0.772597 | 2.187999 | 8.047715 | 4.208774 | 0.000116 | 0.001405 | 1.005936 |
| 62 | <i>C3AR1</i>    | 8.185371 | 7.042688 | 1.142684 | 0.593793 | 1.691574 | 7.677512 | 4.188868 | 0.000123 | 0.001464 | 0.946101 |
| 63 | <b>ABI3BP</b>   | 9.911305 | 7.843304 | 2.068002 | 1.073863 | 3.062141 | 8.992194 | 4.185623 | 0.000125 | 0.001464 | 0.936361 |
| 64 | <i>LUM</i>      | 13.37394 | 12.04099 | 1.332957 | 0.689899 | 1.976016 | 12.78152 | 4.170825 | 0.000131 | 0.001501 | 0.891974 |
| 65 | <i>DCN</i>      | 12.50047 | 11.01845 | 1.482021 | 0.766402 | 2.19764  | 11.84179 | 4.167048 | 0.000132 | 0.001501 | 0.880657 |
| 66 | <i>FLI1</i>     | 8.568956 | 7.144349 | 1.424607 | 0.736083 | 2.113131 | 7.935797 | 4.163247 | 0.000134 | 0.001501 | 0.869272 |
| 67 | <b>VCAM1</b>    | 8.581596 | 6.850553 | 1.731043 | 0.88403  | 2.578056 | 7.812244 | 4.112198 | 0.000158 | 0.00174  | 0.716817 |
| 68 | <i>SERPINA1</i> | 8.363761 | 6.955238 | 1.408524 | 0.715046 | 2.102001 | 7.737751 | 4.086843 | 0.000171 | 0.001858 | 0.641408 |
| 69 | <i>BAG2</i>     | 8.427783 | 7.148475 | 1.279308 | 0.646336 | 1.912281 | 7.859202 | 4.066742 | 0.000182 | 0.001929 | 0.581776 |
| 70 | <i>ZFYVE16</i>  | 8.548574 | 7.77575  | 0.772823 | 0.390357 | 1.15529  | 8.205097 | 4.065773 | 0.000182 | 0.001929 | 0.578905 |
| 71 | <b>FHL1</b>     | 9.364727 | 7.603661 | 1.761065 | 0.884877 | 2.637254 | 8.582031 | 4.044214 | 0.000195 | 0.002036 | 0.515104 |
| 72 | <i>NR3C1</i>    | 10.41566 | 9.622065 | 0.793593 | 0.397189 | 1.189997 | 10.06295 | 4.028246 | 0.000205 | 0.002052 | 0.467952 |
| 73 | <b>MS4A6A</b>   | 6.772603 | 4.597062 | 2.175541 | 1.088538 | 3.262543 | 5.805696 | 4.027105 | 0.000206 | 0.002052 | 0.464586 |
| 74 | <b>CXADR</b>    | 8.695033 | 10.29111 | -1.59608 | -2.39389 | -0.79827 | 9.4044   | -4.02542 | 0.000207 | 0.002052 | 0.459631 |
| 75 | <i>EVI2A</i>    | 6.894859 | 5.785167 | 1.109692 | 0.554678 | 1.664706 | 6.401663 | 4.023046 | 0.000209 | 0.002052 | 0.452615 |
| 76 | <b>CX3CL1</b>   | 7.403502 | 5.389046 | 2.014457 | 1.006175 | 3.022738 | 6.508188 | 4.020058 | 0.000211 | 0.002052 | 0.443809 |
| 77 | <b>DSC2</b>     | 10.22294 | 11.79555 | -1.57261 | -2.36617 | -0.77905 | 10.92188 | -3.98747 | 0.000234 | 0.002244 | 0.347955 |
| 78 | <b>MEOX2</b>    | 7.06517  | 5.010674 | 2.054496 | 0.999201 | 3.10979  | 6.15206  | 3.917308 | 0.000291 | 0.002759 | 0.142807 |
| 79 | <b>UTS2</b>     | 3.977076 | 2.059202 | 1.917873 | 0.930207 | 2.90554  | 3.124688 | 3.907202 | 0.0003   | 0.002811 | 0.113406 |
| 80 | <b>TBX1</b>     | 6.853872 | 8.970473 | -2.1166  | -3.21311 | -1.02009 | 7.794584 | -3.88402 | 0.000323 | 0.002983 | 0.046092 |
| 81 | <i>THBS1</i>    | 11.45082 | 9.904541 | 1.546277 | 0.740957 | 2.351597 | 10.76358 | 3.863446 | 0.000344 | 0.003136 | -0.01346 |
| 82 | <i>MMP2</i>     | 11.75157 | 10.48994 | 1.261629 | 0.603549 | 1.919709 | 11.19085 | 3.857527 | 0.00035  | 0.003136 | -0.03057 |
| 83 | <i>SRPX2</i>    | 7.393977 | 5.871319 | 1.522658 | 0.727562 | 2.317754 | 6.71724  | 3.853355 | 0.000355 | 0.003136 | -0.04262 |

|     |                 |          |          |          |          |          |          |          |          |          |          |
|-----|-----------------|----------|----------|----------|----------|----------|----------|----------|----------|----------|----------|
| 84  | <b>GJA5</b>     | 5.449455 | 3.84465  | 1.604806 | 0.766519 | 2.443093 | 4.736208 | 3.851999 | 0.000356 | 0.003136 | -0.04653 |
| 85  | <b>CLU</b>      | 10.58483 | 8.542835 | 2.041998 | 0.974311 | 3.109685 | 9.677278 | 3.848288 | 0.00036  | 0.003136 | -0.05724 |
| 86  | <b>ADAMTS8</b>  | 3.11158  | 1.296359 | 1.81522  | 0.862186 | 2.768255 | 2.304815 | 3.832454 | 0.000378 | 0.003255 | -0.10289 |
| 87  | <b>PRSS8</b>    | 6.037842 | 8.35102  | -2.31318 | -3.52937 | -1.09699 | 7.065921 | -3.82704 | 0.000385 | 0.003272 | -0.11846 |
| 88  | <b>ASPEN</b>    | 9.327385 | 6.732426 | 2.59496  | 1.227027 | 3.962892 | 8.17407  | 3.817001 | 0.000397 | 0.003337 | -0.14734 |
| 89  | <b>DENND5A</b>  | 8.312798 | 7.607362 | 0.705437 | 0.333016 | 1.077857 | 7.999271 | 3.811362 | 0.000404 | 0.003357 | -0.16354 |
| 90  | <b>NRXN3</b>    | 3.713998 | 1.723964 | 1.990035 | 0.93786  | 3.042209 | 2.829538 | 3.805652 | 0.000411 | 0.003378 | -0.17993 |
| 91  | <b>TFPI2</b>    | 6.876605 | 3.7028   | 3.173804 | 1.492142 | 4.855467 | 5.466025 | 3.797498 | 0.000421 | 0.003426 | -0.20332 |
| 92  | <b>C1S</b>      | 10.46129 | 9.201829 | 1.259463 | 0.591441 | 1.927484 | 9.90153  | 3.793594 | 0.000426 | 0.00343  | -0.2145  |
| 93  | <b>ITGAM</b>    | 6.869665 | 5.309823 | 1.559842 | 0.730339 | 2.389345 | 6.176402 | 3.783719 | 0.00044  | 0.003497 | -0.24277 |
| 94  | <b>TPM2</b>     | 12.82356 | 11.23126 | 1.592298 | 0.744544 | 2.440053 | 12.11587 | 3.779294 | 0.000446 | 0.003508 | -0.25543 |
| 95  | <b>SORD</b>     | 8.785962 | 9.743997 | -0.95803 | -1.47049 | -0.44557 | 9.211755 | -3.76164 | 0.00047  | 0.003664 | -0.30583 |
| 96  | <b>QKI</b>      | 11.17532 | 10.53903 | 0.636283 | 0.295311 | 0.977255 | 10.89252 | 3.754804 | 0.00048  | 0.003702 | -0.32533 |
| 97  | <b>PMP22</b>    | 9.854247 | 8.911144 | 0.943103 | 0.436876 | 1.449329 | 9.43509  | 3.748611 | 0.000489 | 0.003734 | -0.34297 |
| 98  | <b>CRISPLD2</b> | 9.970885 | 8.908296 | 1.06259  | 0.490989 | 1.63419  | 9.498623 | 3.740496 | 0.000502 | 0.003789 | -0.36606 |
| 99  | <b>CCDC80</b>   | 11.99446 | 10.48601 | 1.508448 | 0.693302 | 2.323594 | 11.32404 | 3.723499 | 0.000528 | 0.00395  | -0.41434 |
| 100 | <b>HIPK1</b>    | 9.483144 | 8.865434 | 0.61771  | 0.282627 | 0.952793 | 9.208606 | 3.709268 | 0.000552 | 0.004084 | -0.45468 |
| 101 | <b>GSN</b>      | 11.77425 | 10.71099 | 1.063264 | 0.485773 | 1.640756 | 11.30169 | 3.70469  | 0.00056  | 0.0041   | -0.46763 |
| 102 | <b>PLEKHO1</b>  | 10.80888 | 9.918621 | 0.890255 | 0.404339 | 1.376172 | 10.41321 | 3.686457 | 0.000592 | 0.004291 | -0.51916 |
| 103 | <b>FGF2</b>     | 5.314698 | 3.389958 | 1.92474  | 0.872609 | 2.976871 | 4.459258 | 3.680938 | 0.000602 | 0.004321 | -0.53472 |
| 104 | <b>CTNNB1</b>   | 11.66443 | 10.90388 | 0.760555 | 0.340369 | 1.180741 | 11.32641 | 3.642045 | 0.000677 | 0.004815 | -0.64408 |
| 105 | <b>CTSL</b>     | 9.062662 | 7.926084 | 1.136578 | 0.504892 | 1.768265 | 8.557516 | 3.620378 | 0.000722 | 0.005062 | -0.70473 |
| 106 | <b>WWTR1</b>    | 10.09973 | 9.094521 | 1.005204 | 0.44634  | 1.564069 | 9.652968 | 3.619129 | 0.000725 | 0.005062 | -0.70822 |
| 107 | <b>EREG</b>     | 3.992915 | 6.156164 | -2.16325 | -3.37265 | -0.95385 | 4.954359 | -3.5991  | 0.00077  | 0.005325 | -0.76411 |
| 108 | <b>VSIG4</b>    | 9.150768 | 7.220556 | 1.930212 | 0.850181 | 3.010244 | 8.292896 | 3.596043 | 0.000777 | 0.005325 | -0.77261 |
| 109 | <b>NRP2</b>     | 10.29514 | 9.162454 | 1.132687 | 0.496301 | 1.769072 | 9.791724 | 3.581341 | 0.000812 | 0.00551  | -0.8135  |
| 110 | <b>VIM</b>      | 14.3035  | 13.24121 | 1.062294 | 0.464993 | 1.659595 | 13.83137 | 3.578554 | 0.000819 | 0.00551  | -0.82124 |
| 111 | <b>NFATC2</b>   | 9.350565 | 8.003056 | 1.347509 | 0.588515 | 2.106503 | 8.751672 | 3.572314 | 0.000834 | 0.005563 | -0.83856 |
| 112 | <b>PTK6</b>     | 6.397552 | 7.772476 | -1.37492 | -2.15078 | -0.59906 | 7.008629 | -3.56575 | 0.000851 | 0.005601 | -0.85675 |

|     |                 |          |          |          |          |          |          |          |          |          |          |
|-----|-----------------|----------|----------|----------|----------|----------|----------|----------|----------|----------|----------|
| 113 | <b>SCG2</b>     | 4.170552 | 2.264377 | 1.906175 | 0.830019 | 2.982331 | 3.323364 | 3.56405  | 0.000855 | 0.005601 | -0.86147 |
| 114 | <i>ITGA1</i>    | 9.230424 | 8.299875 | 0.930548 | 0.404452 | 1.456644 | 8.816847 | 3.559018 | 0.000868 | 0.005631 | -0.8754  |
| 115 | <i>PTPRC</i>    | 7.539817 | 6.343455 | 1.196362 | 0.519494 | 1.873231 | 7.008101 | 3.556432 | 0.000875 | 0.005631 | -0.88256 |
| 116 | <b>BMP5</b>     | 4.338512 | 2.272708 | 2.065805 | 0.894832 | 3.236777 | 3.420377 | 3.549759 | 0.000893 | 0.005694 | -0.90102 |
| 117 | <i>KCNJ8</i>    | 7.259001 | 5.957911 | 1.30109  | 0.56116  | 2.04102  | 6.680739 | 3.538125 | 0.000924 | 0.005845 | -0.93315 |
| 118 | <i>FLT1</i>     | 7.917472 | 6.390603 | 1.526869 | 0.653125 | 2.400613 | 7.238863 | 3.516202 | 0.000986 | 0.006157 | -0.99353 |
| 119 | <i>PDGFRB</i>   | 10.36    | 9.206587 | 1.153418 | 0.493142 | 1.813694 | 9.847374 | 3.514936 | 0.00099  | 0.006157 | -0.99701 |
| 120 | <b>PTPRB</b>    | 4.070078 | 2.092443 | 1.977635 | 0.841933 | 3.113337 | 3.191129 | 3.50379  | 0.001023 | 0.006305 | -1.02762 |
| 121 | <b>FGF9</b>     | 3.854895 | 2.206798 | 1.648098 | 0.700982 | 2.595213 | 3.122407 | 3.501357 | 0.001031 | 0.006305 | -1.0343  |
| 122 | <b>IL6</b>      | 5.312837 | 2.478713 | 2.834124 | 1.196531 | 4.471717 | 4.053226 | 3.482323 | 0.001091 | 0.006616 | -1.08642 |
| 123 | <b>NCAM1</b>    | 5.286764 | 2.973735 | 2.313029 | 0.973443 | 3.652616 | 4.258752 | 3.474294 | 0.001117 | 0.006671 | -1.10836 |
| 124 | <i>AKT3</i>     | 9.34515  | 8.234738 | 1.110412 | 0.467264 | 1.753561 | 8.851634 | 3.473997 | 0.001118 | 0.006671 | -1.10917 |
| 125 | <i>PKN1</i>     | 9.4174   | 8.467567 | 0.949833 | 0.398245 | 1.501421 | 8.995252 | 3.464885 | 0.001148 | 0.006765 | -1.13403 |
| 126 | <i>ITGB3</i>    | 7.432487 | 5.993123 | 1.439364 | 0.603248 | 2.275479 | 6.79277  | 3.46386  | 0.001152 | 0.006765 | -1.13683 |
| 127 | <b>ETV4</b>     | 4.855539 | 6.580971 | -1.72543 | -2.72977 | -0.7211  | 5.622398 | -3.45681 | 0.001176 | 0.006852 | -1.15605 |
| 128 | <b>CNN1</b>     | 4.006901 | 1.738547 | 2.268354 | 0.943728 | 3.59298  | 2.998744 | 3.44567  | 0.001215 | 0.007026 | -1.18634 |
| 129 | <i>KIAA1462</i> | 8.18355  | 7.222046 | 0.961504 | 0.398867 | 1.524141 | 7.756215 | 3.438578 | 0.001241 | 0.007078 | -1.2056  |
| 130 | <b>S100A7</b>   | 7.829611 | 11.93479 | -4.10518 | -6.50788 | -1.70247 | 9.654133 | -3.43786 | 0.001243 | 0.007078 | -1.20756 |
| 131 | <b>CHRD1</b>    | 5.909359 | 2.905235 | 3.004124 | 1.242924 | 4.765324 | 4.574192 | 3.432143 | 0.001265 | 0.007143 | -1.22305 |
| 132 | <i>CHRNA7</i>   | 5.154154 | 3.700685 | 1.453469 | 0.598223 | 2.308715 | 4.508168 | 3.419565 | 0.001312 | 0.007287 | -1.25712 |
| 133 | <i>CDK14</i>    | 8.975443 | 7.816931 | 1.158513 | 0.475963 | 1.841062 | 8.460549 | 3.415254 | 0.001329 | 0.007287 | -1.26878 |
| 134 | <i>NAA15</i>    | 7.492039 | 8.442593 | -0.95055 | -1.51071 | -0.3904  | 7.914508 | -3.41448 | 0.001332 | 0.007287 | -1.27088 |
| 135 | <i>ESRP1</i>    | 9.659245 | 10.81963 | -1.16039 | -1.84446 | -0.47631 | 10.17497 | -3.41314 | 0.001337 | 0.007287 | -1.2745  |
| 136 | <i>MAP2K4</i>   | 7.51672  | 8.574664 | -1.05794 | -1.68173 | -0.43416 | 7.986917 | -3.41257 | 0.001339 | 0.007287 | -1.27602 |
| 137 | <b>PLA2G2A</b>  | 8.598091 | 5.321259 | 3.276832 | 1.328358 | 5.225307 | 7.141721 | 3.383886 | 0.001456 | 0.007867 | -1.35336 |
| 138 | <i>CDH1</i>     | 8.835033 | 10.33455 | -1.49952 | -2.39273 | -0.60631 | 9.501487 | -3.37796 | 0.001482 | 0.007925 | -1.36927 |
| 139 | <b>POSTN</b>    | 11.85721 | 10.20854 | 1.64867  | 0.666155 | 2.631184 | 11.12447 | 3.376378 | 0.001489 | 0.007925 | -1.37353 |
| 140 | <i>ALB</i>      | 2.794902 | 1.350269 | 1.444633 | 0.57735  | 2.311915 | 2.152843 | 3.351608 | 0.0016   | 0.008457 | -1.4399  |
| 141 | <i>JUN</i>      | 10.67711 | 9.560218 | 1.11689  | 0.439111 | 1.794669 | 10.18071 | 3.315724 | 0.001775 | 0.009317 | -1.53553 |

|     |               |          |          |          |          |          |          |          |          |          |          |
|-----|---------------|----------|----------|----------|----------|----------|----------|----------|----------|----------|----------|
| 142 | <b>ACTG2</b>  | 6.674539 | 3.992938 | 2.681601 | 1.046505 | 4.316697 | 5.482716 | 3.299949 | 0.001858 | 0.009682 | -1.57737 |
| 143 | <i>GPR124</i> | 6.577779 | 5.192164 | 1.385616 | 0.537935 | 2.233296 | 5.96195  | 3.289022 | 0.001917 | 0.009867 | -1.60628 |
| 144 | <i>CEP170</i> | 9.061795 | 8.507533 | 0.554262 | 0.215128 | 0.893396 | 8.815457 | 3.288517 | 0.00192  | 0.009867 | -1.60762 |

**Supplementary Table 2. PNI cohort categories and nerve proportions.** Green highlighted EXT specimens grouped with major focal/non-PNI cohort using fold change  $\pm 2$  stratification (refer to Figure 3).

| <b>PNI ID</b> | <b>% Nerve proportion*</b> | <b>Age, sex, primary site and additional comments</b>          |
|---------------|----------------------------|----------------------------------------------------------------|
| NONPNI-1      | -                          | 63yo male, scalp. Large nodal mets. CLL                        |
| NONPNI-2      | -                          | 66yo male. Scalp. Large nodal mets.                            |
| NONPNI-3      | -                          | 83yo male. Scalp. Marked inflammatory changes and desmoplasia. |
| NONPNI-4      | -                          | 76yo male. Ear.                                                |
| NONPNI-5      | -                          | 73yo male. Preauricular.                                       |
| NONPNI-6      | -                          | 73yo male. Ear                                                 |
| NONPNI-7      | -                          | 74yo male. Ear.                                                |
| NONPNI-8      | -                          | 53yo female. Scalp.                                            |
| NONPNI-9      | -                          | 59yo male. Preauricular.                                       |
| FOCAL-1       | 1%                         | 74yo male. Ear.                                                |
| FOCAL-2       | 0%                         | 92yo female. Forehead/scalp.                                   |
| FOCAL-3       | 0.50%                      | 65yo male. Upper lip.                                          |
| FOCAL-4       | 0.5-1%                     | 62yo male. Postauricular. Nodal mets.                          |
| FOCAL-5       | 0.5-1%                     | 77yo male. Ear. Nodal mets.                                    |
| FOCAL-6       | <1%                        | 58yo male. Neck.                                               |
| FOCAL-7       | <1%                        | 65yo male. Cheek. Nodal mets.                                  |
| FOCAL-8       | <1%                        | 47yo male. Cheek/parotid.                                      |
| FOCAL-9       | <1%                        | 38yo male. Lip.                                                |
| FOCAL-10      | 1%                         | 83yo male. Preauricular.                                       |
| FOCAL-11      | <1%                        | 62yo male. Temporoparietal.                                    |
| EXT-1         | 20-30%                     | 66 female. Nose.                                               |
| EXT-2         | 30%                        | 73yo female. Cheek.                                            |
| EXT-3         | 50-60%                     | 43 male. Preauricular.                                         |



|        |          |                            |
|--------|----------|----------------------------|
| EXT-4  | 20-30%   | 63yo male. Forehead.       |
| EXT-5  | 40-50%   | 67yo male. Cheek.          |
| EXT-6  | 1%       | 69yo male. Ear.            |
| EXT-7  | 5%       | 71yo male. Cheek.          |
| EXT-8  | 1%       | 74yo male. Forehead.       |
| EXT-9  | 1-5%     | 82yo male. Scalp.          |
| EXT-10 | 1-5%     | 84yo male. Postauricular.  |
| EXT-11 | 1%       | 88yo male. Forehead.       |
| EXT-12 | 1%       | 54yo male. Scalp.          |
| EXT-13 | 1-5%     | 89 female. Forehead.       |
| EXT-14 | 1-5%     | 72yo male. Ear.            |
| EXT-15 | 1%       | 82yo male. Scalp.          |
| EXT-16 | 1%       | 59yo male. Temporal.       |
| EXT-17 | 80%      | 63yo male. Cheek.          |
| EXT-18 | 1%       | 84yo male. Parotid/Cheek.  |
| EXT-19 | 1%       | 38yo male. Lip.            |
| EXT20  | 30 - 40% | 68yo male. Cheek.          |
| EXT21  | 1 - 2%   | 88yo male. Forehead.       |
| EXT22  | 2 -5%    | 55yo male. Preauricular.   |
| EXT23  | 1%       | 78yo male. Nose.           |
| EXT24  | 20 - 30% | 86yo female. Preauricular. |
| EXT25  | 60 - 70% | 58yo male. Cheek.          |

\* Nerve proportion defined as the percentage of nerve tissue contained in the cored slide undergoing expression analysis.



**Supplementary Table 3.** Differential gene expression in EXT-PNI cohorts based on nerve proportion in the specimens showing each genes log2 fold change >1 or < -1 of extensive PNI with high (>10%, n = 9 ) versus low (<10%, n = 16) nerve involvement.

|    | HUGO           | Log2 fold change | std error (log2) | Lower confidence limit (log2) | Upper confidence limit (log2) | Linear fold change | Lower confidence limit (linear) | Upper confidence limit (linear) | P-value  | adj.P. Val |
|----|----------------|------------------|------------------|-------------------------------|-------------------------------|--------------------|---------------------------------|---------------------------------|----------|------------|
| 1  | <i>TMPRSS4</i> | -4.11            | 0.879            | -5.83                         | -2.39                         | 0.0579             | 0.0176                          | 0.191                           | 0.000105 | 0.504      |
| 2  | <i>PRSS22</i>  | -2.72            | 0.663            | -4.02                         | -1.42                         | 0.152              | 0.0616                          | 0.374                           | 0.000437 | 0.889      |
| 3  | <i>ITGB8</i>   | 1.71             | 0.428            | 0.875                         | 2.55                          | 3.28               | 1.83                            | 5.86                            | 0.000554 | 0.889      |
| 4  | <i>EVPL</i>    | -2.13            | 0.578            | -3.27                         | -0.999                        | 0.228              | 0.104                           | 0.5                             | 0.00121  | 1          |
| 5  | <i>KRT14</i>   | -1.84            | 0.524            | -2.86                         | -0.809                        | 0.28               | 0.137                           | 0.571                           | 0.00192  | 1          |
| 6  | <i>NOTCH1</i>  | -0.951           | 0.277            | -1.49                         | -0.408                        | 0.517              | 0.355                           | 0.754                           | 0.00228  | 1          |
| 7  | <i>CLDN7</i>   | -2.36            | 0.711            | -3.76                         | -0.967                        | 0.195              | 0.074                           | 0.512                           | 0.00299  | 1          |
| 8  | <i>IL1RN</i>   | -1.43            | 0.433            | -2.27                         | -0.577                        | 0.372              | 0.207                           | 0.67                            | 0.00318  | 1          |
| 9  | <i>FGFR3</i>   | -2.07            | 0.684            | -3.41                         | -0.727                        | 0.239              | 0.0943                          | 0.604                           | 0.00606  | 1          |
| 10 | <i>DPT</i>     | -2.26            | 0.76             | -3.75                         | -0.774                        | 0.208              | 0.0742                          | 0.585                           | 0.00671  | 1          |
| 11 | <i>RAB25</i>   | -2.12            | 0.718            | -3.53                         | -0.714                        | 0.23               | 0.0868                          | 0.61                            | 0.00711  | 1          |
| 12 | <i>DSC2</i>    | -1.48            | 0.506            | -2.48                         | -0.493                        | 0.357              | 0.18                            | 0.71                            | 0.00742  | 1          |
| 13 | <i>CXADR</i>   | -1.5             | 0.525            | -2.53                         | -0.473                        | 0.353              | 0.173                           | 0.72                            | 0.00884  | 1          |
| 14 | <i>ITGA11</i>  | -2.19            | 0.768            | -3.69                         | -0.681                        | 0.22               | 0.0774                          | 0.624                           | 0.00913  | 1          |
| 15 | <i>MEG3</i>    | -1.2             | 0.423            | -2.03                         | -0.373                        | 0.435              | 0.245                           | 0.772                           | 0.00924  | 1          |
| 16 | <i>IGFBP4</i>  | 1.66             | 0.606            | 0.474                         | 2.85                          | 3.16               | 1.39                            | 7.21                            | 0.0116   | 1          |
| 17 | <i>ALDOA</i>   | -0.861           | 0.314            | -1.48                         | -0.245                        | 0.551              | 0.359                           | 0.844                           | 0.0116   | 1          |
| 18 | <i>VWA1</i>    | 1.72             | 0.632            | 0.484                         | 2.96                          | 3.3                | 1.4                             | 7.79                            | 0.0121   | 1          |
| 19 | <i>TWIST2</i>  | -1.19            | 0.443            | -2.06                         | -0.324                        | 0.438              | 0.24                            | 0.799                           | 0.013    | 1          |
| 20 | <i>CDK14</i>   | 1.11             | 0.412            | 0.299                         | 1.91                          | 2.15               | 1.23                            | 3.77                            | 0.0132   | 1          |

**Supplementary Table 4.** Top ten genes according to adjusted *P*-values with known protein, gene function and disease associations.

| <b>Gene Symbol<sup>1</sup></b> | <b>Protein</b>                                | <b>Function<sup>2</sup></b>                                                                                     | <b>Associations<sup>3</sup></b>                                          | <b>Neural development</b> | <b>Extracellular matrix</b> |
|--------------------------------|-----------------------------------------------|-----------------------------------------------------------------------------------------------------------------|--------------------------------------------------------------------------|---------------------------|-----------------------------|
| <i>PTGIS</i>                   | prostaglandin I2 synthetase                   | Prostacyclin production. Prostacyclin is a vasodilator and inhibitor of platelet aggregation.                   | Hypertension. Pulmonary hypertension. Alzheimer's disease.               | +                         |                             |
| <i>THBS4</i>                   | thrombospondin 4                              | Extracellular calcium binding. Cell proliferation, adhesion and migration.                                      | Prostate cancer. Nephroma.                                               | +                         | +                           |
| <i>SRGN</i>                    | serglycin                                     | Platelet secretory granule proteoglycan. Inflammation and apoptosis.                                            | Mucinoses.                                                               |                           |                             |
| <i>FERMT2</i>                  | fermitin family member 2                      | Cell-ECM adhesion molecule which facilitates cell shape modulation                                              | Kindler syndrome (epidermolysis bullosa). Leukocyte Adhesion Deficiency. | +                         | +                           |
| <i>NR4A3</i>                   | nuclear receptor subfamily 4 group A member 3 | Neural development and cAMP signalling.                                                                         | Chondrosarcoma.                                                          | +                         |                             |
| <i>TIMP1</i>                   | TIMP metalloproteinase inhibitor 1            | Matrix metalloproteinase (MM) inhibitor. Involved in ECM degradation and stromal cell apoptosis. Growth factor. | Lung giant cell carcinoma. Oral submucous fibrosis.                      |                           | +                           |

|               |                                                           |                                                                                                           |                                          |   |   |
|---------------|-----------------------------------------------------------|-----------------------------------------------------------------------------------------------------------|------------------------------------------|---|---|
| <i>SAMSN1</i> | SAM domain, SH3 domain and nuclear localization signals 1 | Cytoplasmic protein involved in signalling, cell spreading and cell polarization.                         | Negative regulator of B cell activation. |   |   |
| <i>HGF</i>    | hepatocyte growth factor                                  | Regulates cell growth, motility and morphology. Angiogenesis, tumour development and tissue regeneration. | Deafness. Hepatocellular carcinoma.      | + | + |
| <i>VCAN</i>   | versican                                                  | Large proteoglycan ECM molecule. Cell adhesion, differentiation, proliferation and migration.             | Wagner syndrome.                         | + | + |
| <i>C3</i>     | complement C3                                             | Complement activation, inflammation, immunity, neural development.                                        | Haemolytic Uremic syndrome.              |   |   |

**1 Gene symbol based on HUGO Gene Nomenclature Committee (HGNC), accessible at <http://www.genenames.org/>**

**2 Function based on OMIM gene description, accessible at <http://www.omim.org/>**

**3 Associations based on GeneCards human gene database, accessible at <http://genecards.org/>**

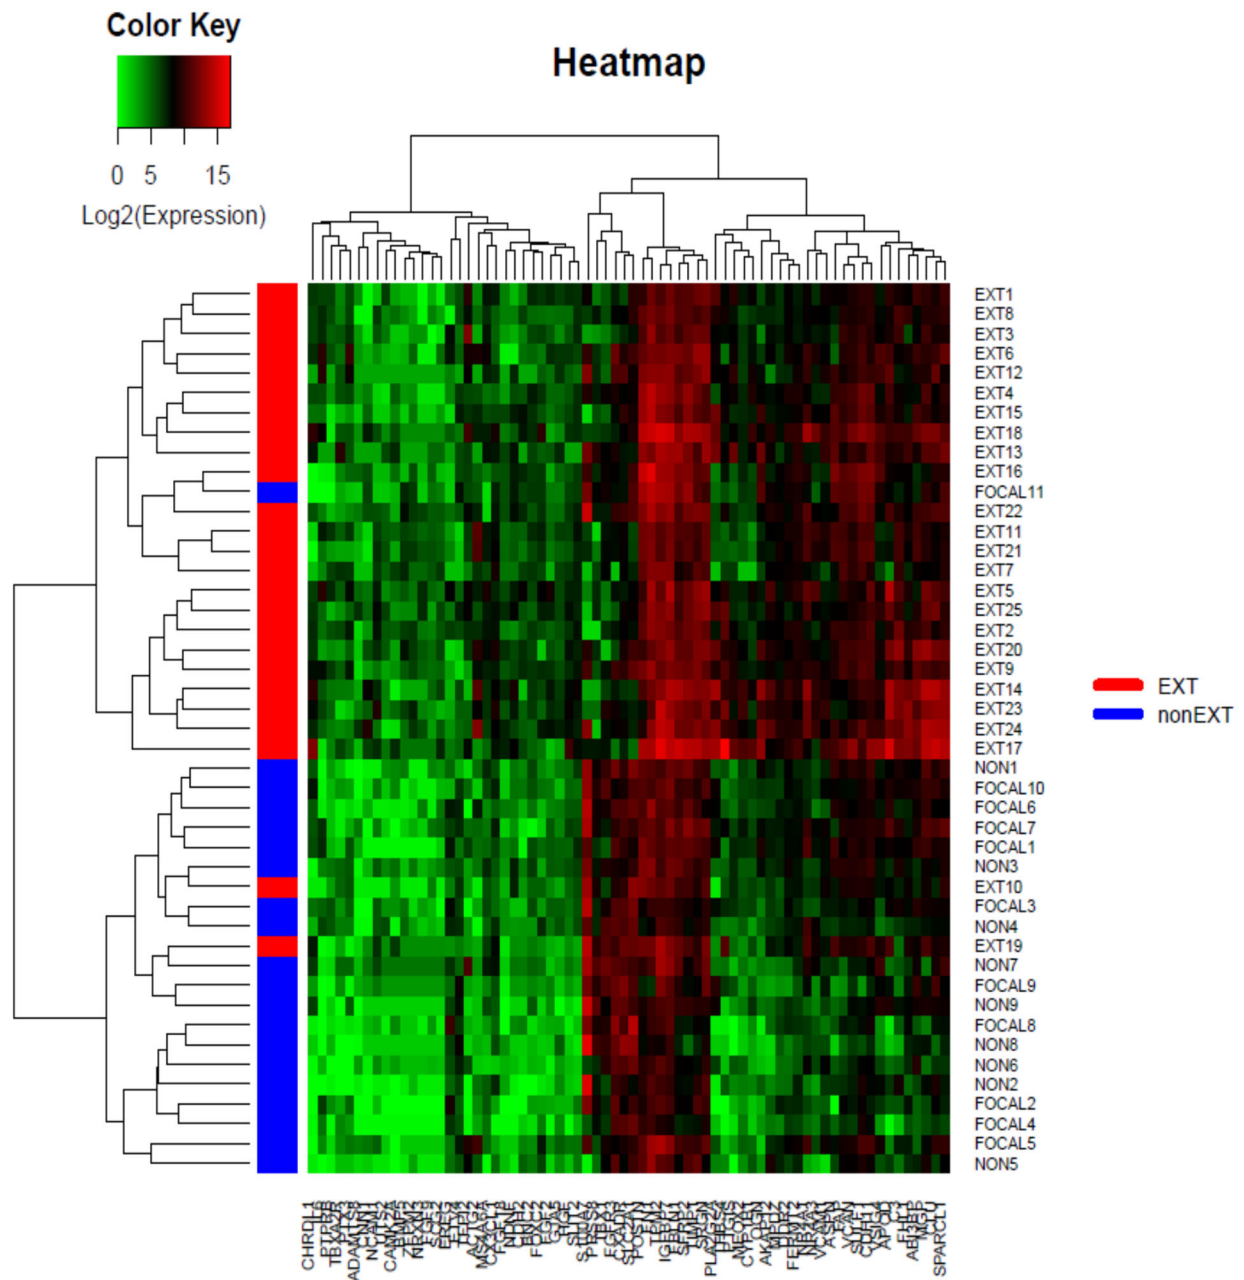

**Supplementary Figure 1.** Heatmap of the normalized data, scaled to give all genes equal variance, generated via unsupervised clustering based on the highest ranking differentially expressed genes between EXT (red) and Focal/Non-PNI (blue – nonEXT) cohorts with fold change  $>3$ ,  $< -3$  and adjusted  $P$ -value  $< 0.01$ . Green represents low expression, Red represents high expression.
